# Supplementary material for: Parasite-Microbiota Interactions With the Vertebrate Gut: Synthesis Through an Ecological Lens
Source: PubMed Central journal article supplement (PMC5960673; doi:10.3389/fmicb.2018.00843), 2018-05-14
Supplement: Table_1.pdf [file Table_1.pdf]

## *Supplementary Material*

### **Parasite-microbiota interactions with the vertebrate gut: synthesis through an ecological lens**

Jacqueline M. Leung<sup>1\*</sup>, Andrea L. Graham<sup>1</sup>, Sarah C. L. Knowles<sup>2\*</sup>

\* **Correspondence:** Jacqueline M. Leung: [jmyl@princeton.edu](mailto:jmyl@princeton.edu)  
Sarah C. L. Knowles: [sknowles@rvc.ac.uk](mailto:sknowles@rvc.ac.uk)

#### 1 Supplementary Tables

**Supplementary Table S1. Summary table of studies investigating helminth-induced alterations to the gut microbiota in vertebrates**

| Host         | Helminth species      | Infective dose    | Sampling time (days p.i.) | Sample site(s)              | Microbiota diversity | Microbiota composition              |        |                                                                                                                                                                                                                                                                                                                                                                                                     | Reference       |
|--------------|-----------------------|-------------------|---------------------------|-----------------------------|----------------------|-------------------------------------|--------|-----------------------------------------------------------------------------------------------------------------------------------------------------------------------------------------------------------------------------------------------------------------------------------------------------------------------------------------------------------------------------------------------------|-----------------|
|              |                       |                   |                           |                             |                      | Phylum                              | Family | Genus                                                                                                                                                                                                                                                                                                                                                                                               |                 |
| <b>Swine</b> |                       |                   |                           |                             |                      |                                     |        |                                                                                                                                                                                                                                                                                                                                                                                                     |                 |
| Pig          | <i>Trichuris suis</i> | 2x10 <sup>4</sup> | 21                        | Luminal contents from colon | No change            | ↑Deferribacteres<br>↑Proteobacteria |        | ↑ <i>Desulvibrio</i><br>↑ <i>Mucispirillum</i><br>↑ <i>Paraprevotella</i><br><br>↓ <i>Asteroleplasma</i><br>↓ <i>Blautia</i><br>↓ <i>Coprobacillus</i><br>↓ <i>Dorea</i><br>↓ <i>Eubacterium</i><br>↓ <i>Oribacterium</i><br>↓ <i>Oscillibacter</i><br>↓ <i>Peptococcus</i><br>↓ <i>Scwartzia</i><br>↓ <i>Selenomonas</i><br>↓ <i>Spirochaeta</i><br>↓ <i>Sporobacter</i><br>↓ <i>Succinivibrio</i> | Li et al., 2012 |

|               |                        |                   |                                        |                                                                  |                                                         |                                                                      |                                                                                                           |                                                                                                                                                                                                                                                                                                                                                                                         |                       |
|---------------|------------------------|-------------------|----------------------------------------|------------------------------------------------------------------|---------------------------------------------------------|----------------------------------------------------------------------|-----------------------------------------------------------------------------------------------------------|-----------------------------------------------------------------------------------------------------------------------------------------------------------------------------------------------------------------------------------------------------------------------------------------------------------------------------------------------------------------------------------------|-----------------------|
| Pig           | <i>Trichuris suis</i>  | 2x10 <sup>4</sup> | 53                                     | Luminal contents from colon                                      | N/A                                                     | ↓Fibrobacteres<br>↓Spirochaetes<br>↓Tenericutes<br>↓Gemmatimonadetes |                                                                                                           | ↓ <i>Fibrobacter</i><br>↓ <i>Treponema</i><br>↓ <i>Spirochaeta</i><br>↓ <i>Dorea</i><br>↓ <i>Brachyspira</i><br>↓ <i>Mycoplasma</i><br>↓ <i>Thermotoga</i><br>↓ <i>Actinobacillus</i><br>↓ <i>Francisella</i><br>↓ <i>Erysipelothrix</i><br>↓ <i>Ruminococcus</i>                                                                                                                       | Wu et al., 2012       |
| Pig           | <i>Ascaris suum</i>    | 5000              | 14                                     | Proximal gut                                                     | No change                                               |                                                                      |                                                                                                           | ↑ <i>Cellulosimicrobium</i><br>↑ <i>Facklamia</i><br>↑ <i>Haemophilus</i><br>↑ <i>Succinivibrio</i><br>↑ <i>Turicibacter</i><br>↑Paraprevotellaceae uc.<br>↑Pasteurellaceae uc.<br>↑Planococcaceae uc.<br>↑Porphyromonadaceae uc.<br>↑Succinivibrionaceae uc.<br><br>↓ <i>Catenibacterium</i><br>↓Veillonellaceae uc.                                                                   | Williams et al., 2017 |
| <b>Rodent</b> |                        |                   |                                        |                                                                  |                                                         |                                                                      |                                                                                                           |                                                                                                                                                                                                                                                                                                                                                                                         |                       |
| Mouse         | <i>Trichuris muris</i> | 20                | 14, 28, 42, 49, 56, 63, 70, 77, 84, 91 | Feces                                                            | Decreased alpha diversity on days 41 and 91             |                                                                      | ↑Rikenellaceae<br>↑Family F16 from TM7 phylum                                                             | ↑ <i>Mucispirillum</i><br><br>↓ <i>Prevotella</i><br>↓ <i>Parabacteroides</i>                                                                                                                                                                                                                                                                                                           | Houlden et al., 2015  |
| Mouse         | <i>Trichuris muris</i> | 20                | 13, 20, 27, 35                         | Feces for days 13, 20, 27; Luminal contents from colon on day 35 | Decreased alpha, beta, and gamma diversity after day 27 | ↑Firmicutes<br>↑Proteobacteria<br><br>↓Bacteroidetes                 | ↑Lactobacillaceae<br>↑Rikenellaceae<br><br>↓Desulfovibrionaceae<br>↓Ruminococceae<br>↓Erysipelotrichaceae | ↑ <i>Bifidobacterium</i><br>↑ <i>Lactobacillus</i><br>↑ <i>Alistipes</i><br>↑ <i>Odirobacter</i><br>↑ <i>Oscillibacter</i><br>↑ <i>Butyricicoccus</i><br>↑ <i>Parasutterella</i><br>↑ <i>Sphingomonas</i><br>↑ <i>Halomonas</i><br>↑ <i>Mucispirillum</i><br><br>↓ <i>Parabacteroides</i><br>↓ <i>Barnesiella</i><br>↓ <i>Allobaculum</i><br>↓ <i>Roseburia</i><br>↓ <i>Sporobacter</i> | Holm et al., 2015     |

|       |                                         |     |              |                                               |                                                                                                        |                                                            |                                                                                                                                 |                                                                                                                                                                          |                       |
|-------|-----------------------------------------|-----|--------------|-----------------------------------------------|--------------------------------------------------------------------------------------------------------|------------------------------------------------------------|---------------------------------------------------------------------------------------------------------------------------------|--------------------------------------------------------------------------------------------------------------------------------------------------------------------------|-----------------------|
| Mouse | <i>Trichuris muris</i>                  | 25  | 21, 35       | Feces, SI mucosa                              | Decreased alpha diversity in WT infected animals, but increased alpha diversity in Nod2 <sup>-/-</sup> |                                                            | ↑Lachnospiraceae<br>↑Clostridiales (order)                                                                                      | ↓ <i>Prevotella</i><br>↓ <i>Bacteroides</i>                                                                                                                              | Ramanan et al., 2016  |
| Mouse | <i>Trichuris muris</i>                  | 200 | 20-22, 26-29 | Feces                                         | Decreased alpha diversity in re-wilded mice                                                            |                                                            |                                                                                                                                 | In the lab:<br>↑ <i>Alistipes</i> (reversed in re-wilded mice)<br><br>↓ <i>Ruminococcus</i><br>↓ <i>Allobaculum</i><br>↓ <i>Barnesiella</i> (reversed in re-wilded mice) | Leung et al., 2018    |
| Mouse | <i>Heligmosomoides polygyrus</i>        | 200 | 12, 35       | Feces, SI mucosa                              | N/A                                                                                                    |                                                            | ↑Clostridiales (order)                                                                                                          | ↓ <i>Bacteroides</i>                                                                                                                                                     | Ramanan et al., 2016  |
| Mouse | <i>Heligmosomoides polygyrus bakeri</i> | 200 | 6, 14, 28    | Luminal contents from ileum, cecum, and colon | N/A                                                                                                    | ↑g-Proteobacterium                                         | ↑Enterobacteriaceae<br>↑Porphyromonadaceae                                                                                      | ↑ <i>Lactobacillus</i><br>↑ <i>Bacteroides</i><br>↑ <i>Prevotella</i><br><br>↓ <i>Paenibacillus</i>                                                                      | Rausch et al., 2013   |
| Mouse | <i>Heligmosomoides polygyrus bakeri</i> | 200 | 28           | Duodenum, feces                               | N/A                                                                                                    |                                                            | ↑Enterobacteriaceae                                                                                                             | ↑ <i>Lactobacillus</i>                                                                                                                                                   | Reynolds et al., 2014 |
| Mouse | <i>Heligmosomoides polygyrus</i>        | N/A | 14           | Ileum, cecum tissue                           | N/A                                                                                                    |                                                            | ↑Lactobacillaceae<br>↑Clostridaceae<br>↑Porphyromonadaceae<br><br>↓Erysipelotrichaceae<br>↓Clostridiales (order)                |                                                                                                                                                                          | Walk et al., 2010     |
| Mouse | <i>Heligmosomoides polygyrus bakeri</i> | 200 | 21           | Cecal contents                                | Not consistent                                                                                         |                                                            | ↑Clostridiales (order)                                                                                                          | ↑ <i>HA-107 E. coli</i>                                                                                                                                                  | Zaiss et al., 2015    |
| Mouse | <i>Nippostrongylus brasiliensis</i>     | 500 | 11           | SI lumen; feces                               | No change                                                                                              | ↑ <i>Bacteroides</i><br>↑Actinobacteria<br><br>↓Firmicutes | ↑Lactobacillaceae<br>↑S24-7 Family<br>↑Coriobacteriaceae<br><br>↓Peptostreptococcaceae<br>↓Clostridiaceae<br>↓Turicibacteraceae |                                                                                                                                                                          | Fricke et al., 2015   |

|                 |                                                                                  |                    |                                                           |                                                  |                                                        |                                                                                                                     |                                                                                                                                                                                                                            |                                                                                                 |                         |
|-----------------|----------------------------------------------------------------------------------|--------------------|-----------------------------------------------------------|--------------------------------------------------|--------------------------------------------------------|---------------------------------------------------------------------------------------------------------------------|----------------------------------------------------------------------------------------------------------------------------------------------------------------------------------------------------------------------------|-------------------------------------------------------------------------------------------------|-------------------------|
| Mouse           | <i>Trichinella spiralis</i>                                                      | 300-500            | 12                                                        | SI and LI luminal contents                       | N/A                                                    |                                                                                                                     | ↑Clostridiales (order)<br>↑Ruminococcaceae<br>↑Lachnospiraceae<br>↑Lactobacillaceae<br><br>↓Clostridiceae<br>↓Turicibacteraceae                                                                                            |                                                                                                 | Osborne et al., 2014    |
| Wild mouse      | <i>Heligmosomoides polygyrus</i> ; <i>Syphacia</i> spp.; <i>Hymenolepis</i> spp. | N/A                | N/A                                                       | Lumen of stomach, SI, cecum, and distal colon    | No change                                              | <i>H. polygyrus</i> :<br>↑Firmicutes<br>↓Bacteroidetes<br><br><i>Syphacia</i> spp:<br>↑Bacteroidetes<br>↓Firmicutes | <i>H. polygyrus</i> & <i>Syphacia</i> spp:<br>↓Lachnospiraceae<br>↓Lactobacillaceae<br>↓Ruminococcaceae<br>↓Acetobacteraceae<br>↓Sphingomonadaceae<br>↓S24-7<br><br><i>Hymenolepis</i> spp:<br>↑S24-7<br>↑Lactobacillaceae |                                                                                                 | Kreisinger et al., 2015 |
| Wild mouse      | <i>Heligmosomoides polygyrus</i>                                                 | N/A                | N/A                                                       | Feces                                            | N/A                                                    |                                                                                                                     |                                                                                                                                                                                                                            | ↑Escherichia<br>↓Lachnospiraceae uc.                                                            | Maurice et al., 2015    |
| Rat             | <i>Hymenolepis diminuta</i>                                                      | 4                  | 62                                                        | Luminal contents of cecum                        | No change                                              |                                                                                                                     | ↑Peptostreptococcaceae                                                                                                                                                                                                     | ↓ <i>Turicibacter</i>                                                                           | McKenney et al., 2015   |
| Rat             | <i>Hymenolepis diminuta</i>                                                      | 10 each for 3 days | 3 consecutive days followed by a 7-10 day gap for 50 days | Feces                                            | No change in alpha diversity; shifts in beta diversity |                                                                                                                     | ↑Erysipelotrichaceae<br>↑S24-7<br>↑Ruminococcaceae<br>↑Mollicutes order RF39                                                                                                                                               | ↑ <i>Turicibacter</i><br>↑ <i>Sutterella</i>                                                    | Parfrey et al., 2017    |
| Hamster         | <i>Opisthorchis viverrini</i>                                                    | 50                 | 42                                                        | Feces from colon and rectum; bile from bile duct | Increased alpha diversity                              | ↑Spirochaetes                                                                                                       | ↑Ruminococcaceae<br>↑Lachnospiraceae<br><br>↓Porphyromonadaceae<br>↓Erysipelotrichaceae                                                                                                                                    | ↑ <i>Lactobacillus</i>                                                                          | Plieskett et al., 2013  |
| Rabbit          | <i>Trichostrongylus retortaeformis</i>                                           | 1000 every 7 days  | 0, 15, 30, 60                                             | Mucosa of duodenum                               | Decreased alpha diversity                              | ↑Proteobacteria<br>↑Spirochaetes<br><br>↓Firmicutes                                                                 | ↑Leptosiraceae<br>↑Desulfobacteraceae<br><br>↓Ruminococcaceae<br>↓Porphyromonadaceae<br>↓Bacteroidaceae                                                                                                                    | ↑ <i>Leptomna</i><br>↑ <i>Desulfocella</i><br><br>↓ <i>Ruminococcus</i><br>↓ <i>Bacteroides</i> | Cattadori et al., 2016  |
| <b>Ruminant</b> |                                                                                  |                    |                                                           |                                                  |                                                        |                                                                                                                     |                                                                                                                                                                                                                            |                                                                                                 |                         |
| Goat            | <i>Haemonchus contortus</i>                                                      | 5,000              | 50                                                        | Lumen of abomasum                                | No change                                              | ↓Euryarchaeota                                                                                                      | ↑Pasteurellales (order)<br>↑Prevotellaceae                                                                                                                                                                                 | ↑ <i>Prevotella</i><br>↑ <i>Selenomonas ruminantium</i>                                         | Li et al., 2016         |

|                             |                             |                   |          |                           |                                                                         |                                                                                                                                                                                                                                                                                    |                                        |                                                                                                                                           |                         |
|-----------------------------|-----------------------------|-------------------|----------|---------------------------|-------------------------------------------------------------------------|------------------------------------------------------------------------------------------------------------------------------------------------------------------------------------------------------------------------------------------------------------------------------------|----------------------------------------|-------------------------------------------------------------------------------------------------------------------------------------------|-------------------------|
| Sheep                       | <i>Haemonchus contortus</i> | 5,000             | 7, 50    | Rumen and abomasum fluids | Increased alpha diversity                                               | In abomasum fluids:<br>↑Lentisphaerae*<br>↑Bacteroidetes*<br>↑Tenericutes*<br>↑Candidate_division_TM7*<br>↑Synergistetes<br>↑Firmicutes*<br>↑Elusimicrobia<br>↑Fibrobacteres*<br>↑Proteobacteria*<br>↑Cyanobacteria<br>↑Actinobacteria*<br>↑Spirochaetae<br>*Also ↑ in rumen fluid |                                        | ↑ <i>Prevotella</i>                                                                                                                       | El-Ashram et al., 2017  |
| Calf                        | <i>Ostertagia ostertagi</i> | 1x10 <sup>5</sup> | 14       | Lumen of abomasum         | No change                                                               |                                                                                                                                                                                                                                                                                    |                                        | ↑ <i>Ethanoligenes</i><br>↓ <i>Subdoligranulum</i>                                                                                        | Li et al., 2011         |
| <b>Companion animal</b>     |                             |                   |          |                           |                                                                         |                                                                                                                                                                                                                                                                                    |                                        |                                                                                                                                           |                         |
| Dog                         | <i>Ancylostoma caninum</i>  | N/A               | N/A      | Feces                     | No change                                                               |                                                                                                                                                                                                                                                                                    |                                        |                                                                                                                                           | Slapeta et al., 2015    |
| Cat                         | <i>Toxocara cati</i>        | N/A               | N/A      | Feces                     | No Change                                                               | ↑Actinobacteria                                                                                                                                                                                                                                                                    | ↑Coriobacteriaceae<br>↑Enterococcoceae | ↑ <i>Collinsella</i><br>↑ <i>Enterococcus</i><br>↑ <i>Dorea</i><br>↑ <i>Ruminococcus</i><br>↓ <i>Bulleidia</i><br>↓ <i>Jeotgalicoccus</i> | Duarte et al., 2016     |
| <b>Primate</b>              |                             |                   |          |                           |                                                                         |                                                                                                                                                                                                                                                                                    |                                        |                                                                                                                                           |                         |
| Macaque                     | <i>Trichuris trichiura</i>  | 1,000             | 98       | Colon mucosa              | Increased alpha diversity (although not statistically significant)      | ↑Tenericutes<br>↑Bacteroidetes<br>↑Elusimicrobia<br>↓Cyanobacteria<br>↓ZB2                                                                                                                                                                                                         |                                        | ↓ <i>Streptophyta</i>                                                                                                                     | Broadhurst et al., 2012 |
| Human with Celiac's Disease | <i>Necator americanus</i>   | 20                | 0, 56    | Feces                     | No change                                                               |                                                                                                                                                                                                                                                                                    |                                        |                                                                                                                                           | Cantacessi et al., 2014 |
| Human with Celiac's Disease | <i>Necator americanus</i>   | 20                | 168, 252 | Mucosa of duodenum        | Increased alpha diversity at 168 days; returned to baseline at 252 days | ↑Bacteroidetes                                                                                                                                                                                                                                                                     |                                        |                                                                                                                                           | Giacomin et al., 2016   |

|       |                                                                   |     |     |       |                                                                                                                                      |                                                                                                                     |                                                                                                                                                                                                    |                                                                                                                                                                                                                                                                                                                                                    |                      |
|-------|-------------------------------------------------------------------|-----|-----|-------|--------------------------------------------------------------------------------------------------------------------------------------|---------------------------------------------------------------------------------------------------------------------|----------------------------------------------------------------------------------------------------------------------------------------------------------------------------------------------------|----------------------------------------------------------------------------------------------------------------------------------------------------------------------------------------------------------------------------------------------------------------------------------------------------------------------------------------------------|----------------------|
| Human | Mix of <i>Trichuris</i> spp., <i>Ascaris</i> spp., and hookworms  | N/A | N/A | Feces | No difference in alpha diversity; Increased beta diversity                                                                           |                                                                                                                     | <p>↑Verrucomicrobiaceae<br/>↑Enterobacteriaceae</p> <p>↓Bacteroidaceae<br/>↓Leuconostocaceae</p>                                                                                                   | <p>↑<i>Lactococcus</i><br/>↑<i>Akkermansia</i><br/>↑Undefined Enterobacteriaceae</p> <p>↓<i>Bacteroides</i></p>                                                                                                                                                                                                                                    | Jenkins et al., 2017 |
| Human | Mix of <i>Trichuris</i> spp., <i>Ascaris</i> spp., and hookworms  | N/A | N/A | Feces | Increased alpha diversity                                                                                                            |                                                                                                                     | ↑Paraprevotellaceae                                                                                                                                                                                | ↓ <i>Bifidobacterium</i>                                                                                                                                                                                                                                                                                                                           | Lee et al., 2014     |
| Human | Mix of <i>Trichuris trichiura</i> and <i>Ascaris lumbricoides</i> | N/A | N/A | Feces | <p><i>T. trichiura</i> only: No change</p> <p>Mix of <i>T. trichiura</i> &amp; <i>A. lumbricoides</i>: Decreased alpha diversity</p> |                                                                                                                     |                                                                                                                                                                                                    | <p>Mix of <i>T. trichiura</i> and <i>A. lumbricoides</i>:<br/>↑<i>Streptococcus</i></p>                                                                                                                                                                                                                                                            | Cooper et al., 2013  |
| Human | Mix of <i>Trichuris</i> spp., <i>Ascaris</i> spp. and hookworms   | N/A | N/A | Feces | Increased alpha diversity                                                                                                            | After self-clearing*:<br>↑Synergistetes<br>(*Note: These are individuals going from worm-positive to worm-negative) | <p>After deworming*:<br/>↓Sutterellaceae</p> <p>After self-clearing*:<br/>↑Porphyromonadaceae<br/>↑Bacteroidaceae<br/>(*Note: These are individuals going from worm-positive to worm-negative)</p> | <p>After deworming*:<br/>↑<i>Sphingobacterium</i><br/>↑<i>Clostridium_XVIII</i><br/>↓<i>Xylanibacter</i><br/>↓<i>Leuconostoc</i><br/>↓<i>Butyricimonas</i></p> <p>After self-clearing*:<br/>↑<i>Parabacteroides</i><br/>↑<i>Bacteroides</i><br/>↓<i>Olsenella</i><br/>(*Note: These are individuals going from worm-positive to worm-negative)</p> | Rosa et al., 2018    |
| Human | <i>Enterobius vermicularis</i>                                    | N/A | N/A | Feces | Increased alpha diversity                                                                                                            |                                                                                                                     |                                                                                                                                                                                                    | <p>↑<i>Alistipes</i><br/>↑<i>Faecalibacterium</i></p> <p>↓<i>Fusobacterium</i><br/>↓<i>Veilonella</i><br/>↓<i>Megashpaera</i><br/>↓<i>Acidaminococcus</i><br/>(Note: The corrected p-values (FDRs) for all these taxa were &gt;0.05.)</p>                                                                                                          | Yang et al., 2017    |
